# Supplementary material for: Comparative Gene Expression Analysis Reveals Similarities and Differences of Chronic Myeloid Leukemia Phases
Source: MDPI journal article supplement (doi:10.3390/cancers14010256), 2022-01-05
Supplement: s1 [file s1]

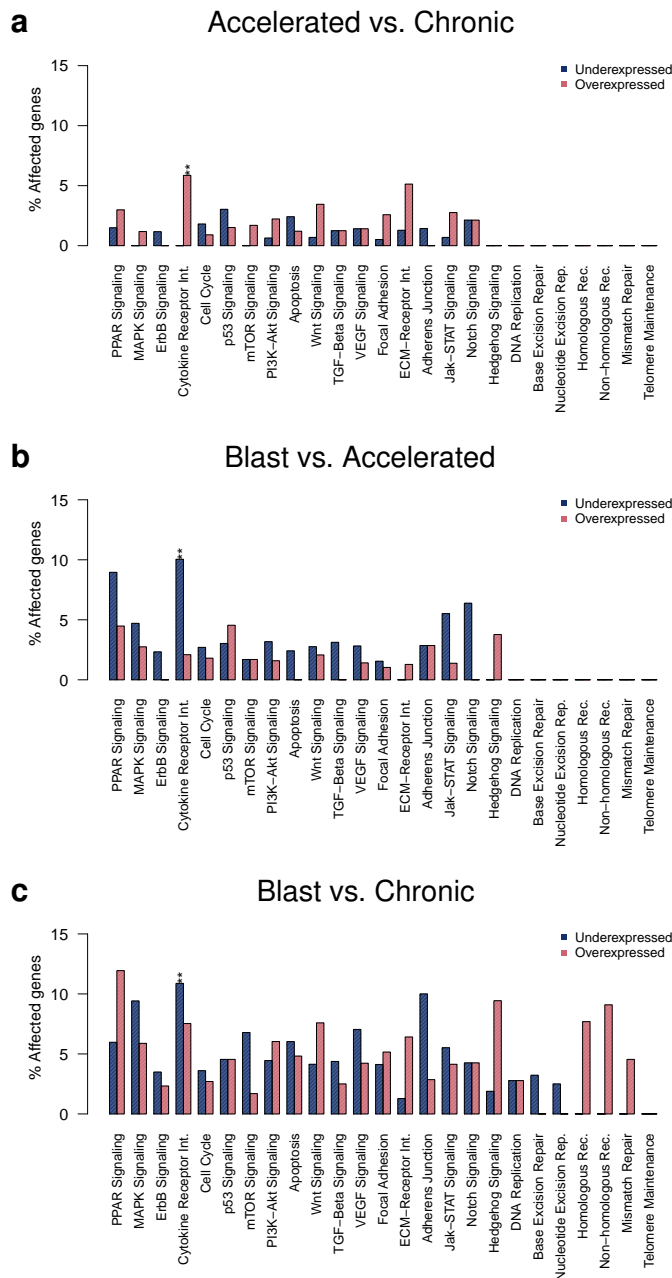

**Figure S1:** Gene expression alterations affecting cancer-relevant signaling pathways. Percentages of under- and overexpressed genes observed for specific signaling pathways are shown for the pairwise comparisons of the three CML phases. Differentially expressed genes at the q-value cutoff of 0.05 with an average expression change of  $|\log_2\text{-ratio}| \geq 1$  were considered. Overrepresented pathways were marked by asterisks separately for an enrichment of under- or overexpressed genes (Fisher's exact test: '\*\*\*' for FDR-adjusted  $p < 0.01$ ). Signaling pathway alterations for the comparisons of accelerated to chronic phase, blast to accelerated phase, and blast to chronic phase are shown in the subpanels (a), (b), and (c), respectively.
