# Supplementary material for: Comparative Gene Expression Analysis Reveals Similarities and Differences of Chronic Myeloid Leukemia Phases
Source: MDPI journal article supplement (doi:10.3390/cancers14010256), 2022-01-05
Supplement: s1 [file s1]

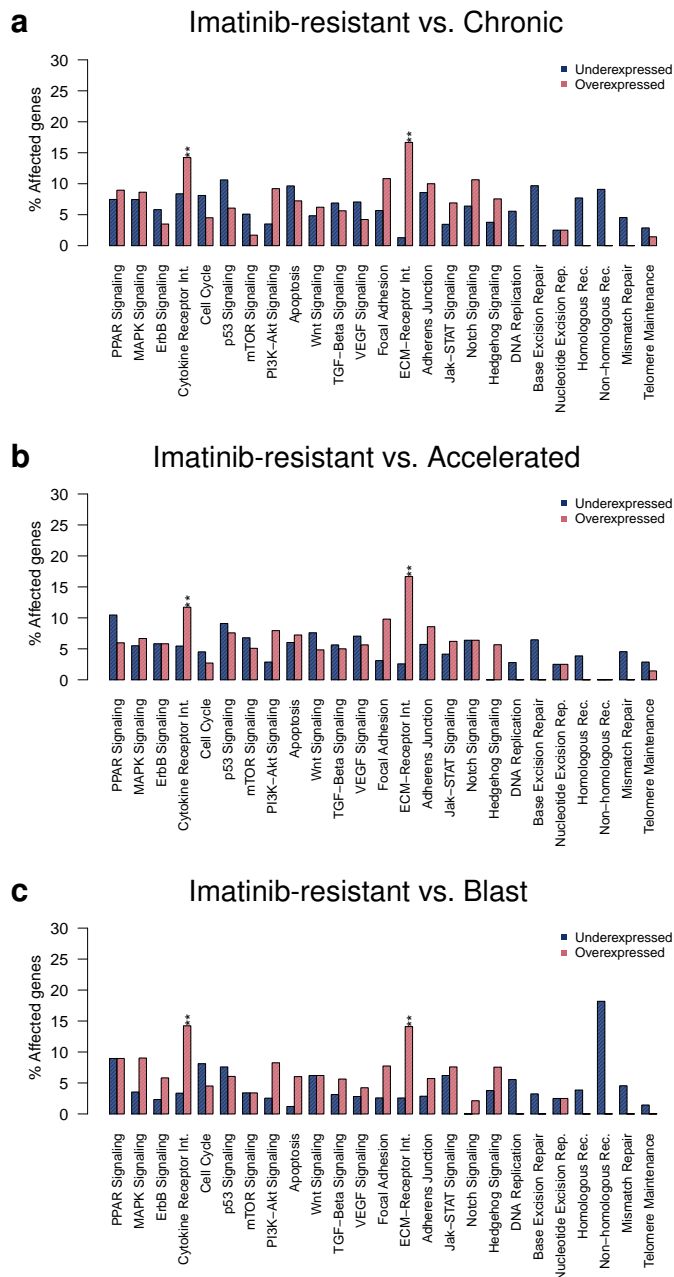

**Figure S3:** Signaling pathway alterations distinguishing Imatinib-resistant patients from patients of the three CML phases. Percentages of under- and overexpressed genes observed for specific signaling pathways are shown for each pairwise comparison. Differentially expressed genes at the q-value cutoff of 0.05 with an average absolute expression change of  $|\log_2\text{-ratio}| \geq 1$  were considered. Overrepresented pathways were marked by asterisks separately for an enrichment of under- or overexpressed genes (Fisher's exact test: '\*\*\*' for FDR-adjusted  $p < 0.01$ ). Individual signaling pathway alterations for the comparison of Imatinib-resistant CML patients to the patients of the three CML phases are shown in the subpanels (a), (b), and (c).
